# Supplementary material for: Challenges in simulating ozone depletion events in the Arctic boundary layer: a case study using ECHAM/MESSy for spring 2019/2020
Source: Copernicus journal article supplement (doi:10.5194/acp-25-15653-2025), 2025-11-17
Supplement: Supplementary file [file acp-25-15653-2025-supplement-title-page.pdf › acp-25-15653-2025-supplement-title-page.pdf]

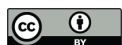

*Supplement of*

## **Challenges in simulating ozone depletion events in the Arctic boundary layer: a case study using ECHAM/MESSy for spring 2019/2020**

**Stefanie Falk et al.**

*Correspondence to:* Stefanie Falk ([stefanie.falk@kit.edu](mailto:stefanie.falk@kit.edu))

- [acp-25-15653-2025-supplement-title-page.pdf](#)
- [EMAC\\_namelists.zip](#)
- [meccanism.pdf](#)

The copyright of individual parts of the supplement might differ from the article licence.
